# Supplementary material for: Adverse perinatal outcomes and housing conditions as determinants of early-life respiratory health: Evidence from Ireland
Source: Research Square preprint supplement (doi:10.21203/rs.3.rs-7564778/v1), 2025-10-23
Supplement: Supplementary file 1 [file 191d02fefb0fb2e9be60fc87.docx]

Additional File 1a. Weighted prevalences of asthma and wheezing/asthma symptoms at 9 months of age, by selected maternal characteristics and birth details. Source: Authors’ calculations using data from the Growing Up in Ireland Cohort’08.

|  | **Asthma prevalence (95% CI)** | **Respiratory symptoms (95% CI)** |
| --- | --- | --- |
| **Baby gender** | | |
| Female | 3.1 (2.6, 3.7) | 6.8 (6.0, 7.6) |
| Male | 4.9 (4.2, 5.6) | 10.9 (9.9, 11.9) |
| **Household Income Quintile** | | |
| 1 (lowest) | 5.2 (4.0, 6.4) | 10.4 (8.8, 12.0) |
| 2 | 4.5 (3.4, 5.7) | 11.0 (9.2, 12.7) |
| 3 | 4.0 (3.0, 5.0) | 8.9 (7.5, 10.4) |
| 4 | 3.3 (2.4, 4.1) | 7.7 (6.5, 9.0) |
| 5 (highest) | 3.3 (2.4, 4.2) | 6.7 (5.5, 7.9) |
| **Household Smoking** | | |
| No | 3.5 (3.0, 4.0) | 8.1 (7.3, 8.8) |
| Yes | 4.9 (4.1, 5.7) | 10.3 (9.1, 11.4) |
| **Maternal Health** | | |
| Absence of diseases | 3.8 (3.3, 4.3) | 8.0 (7.3, 8.6) |
| Any chronic disease | 5.8 (4.3, 7.3) | 15.6 (13.1, 18.0) |
| **Smoking During Pregnancy** | | |
| No | 3.7 (3.1, 4.2) | 7.8 (7.1, 8.5) |
| Yes | 4.9 (4.0, 5.7) | 10.7 (9.4, 11.9) |
| Missing | 2.7 (0.2, 5.3) | 15.5 (8.8, 22.1) |
| **Maternal Age Group** | | |
| 13 - 19 | 9.0 (3.9, 14.1) | 19.8 (12.2, 27.3) |
| 20 - 24 | 3.7 (2.4, 5.1) | 10.2 (8.0, 12.4) |
| 25 - 29 | 5.0 (3.8, 6.1) | 10.0 (8.4, 11.6) |
| 30 - 34 | 3.7 (3.1, 4.4) | 7.9 (6.9, 8.9) |
| 35 - 53 | 3.6 (2.9, 4.3) | 8.2 (7.2, 9.3) |
| **Maternal Country of Birth** | | |
| Not Ireland | 2.3 (1.6, 3.0) | 5.2 (4.1, 6.2) |
| Ireland | 4.5 (4.0, 5.1) | 10.0 (9.2, 10.7) |
| **Maternal University Education** | | |
| Not university level | 4.4 (3.8, 4.9) | 9.7 (8.8, 10.5) |
| University level | 3.2 (2.6, 3.9) | 7.0 (6.2, 7.9) |

Additional File 1b. Weighted prevalences of asthma, wheezing and respiratory allergies at 3 years old, by selected maternal characteristics and birth details. Source: Authors’ calculations using data from the Growing Up in Ireland Cohort’08.

|  | **Asthma prevalence (95% CI)** | **Wheezing prevalence (95% CI)** | **Respiratory allergy prevalence (95% CI)** |
| --- | --- | --- | --- |
| **Baby gender** | | | |
| Female | 4.6 (3.9, 5.4) | 28.7 (27.0, 30.4) | 0.8 (0.5, 1.1) |
| Male | 7.7 (6.8, 8.6) | 32.5 (31.0, 34.1) | 1.7 (1.2, 2.1) |
| **Household Income Quintile** | | | |
| 1 (lowest) | 7.8 (6.2, 9.4) | 34.3 (31.5, 37.1) | 1.7 (0.8, 2.6) |
| 2 | 6.1 (4.7, 7.5) | 30.3 (27.4, 33.1) | 1.3 (0.6, 2.0) |
| 3 | 5.8 (4.6, 7.1) | 29.4 (27.0, 31.9) | 1.0 (0.4, 1.6) |
| 4 | 5.6 (4.4, 6.8) | 28.7 (26.3, 31.1) | 1.2 (0.7, 1.8) |
| 5 (highest) | 5.6 (4.4, 6.8) | 30.3 (27.7, 32.8) | 1.2 (0.6, 1.7) |
| **Household Smoking** | | | |
| No | 5.9 (5.2, 6.6) | 29.5 (28.1, 30.9) | 1.3 (0.9, 1.6) |
| Yes | 6.7 (5.6, 7.7) | 33.0 (30.9, 35.0) | 1.2 (0.7, 1.7) |
| **Maternal Health** | | | |
| Absence of diseases | 5.4 (4.9, 6.0) | 29.4 (28.2, 30.7) | 1.0 (0.8, 1.3) |
| Any chronic disease | 11.6 (9.3, 14.0) | 39.4 (36.0, 42.9) | 2.7 (1.4, 3.9) |
| **Maternal Age Group** | | | |
| 13 - 19 | 9.2 (3.7, 14.7) | 46.2 (36.0, 56.3) | 0.1 (-0.1, 0.4) |
| 20 - 24 | 8.3 (6.1, 10.6) | 35.4 (31.4, 39.4) | 0.8 (-0.2, 1.8) |
| 25 - 29 | 7.2 (5.8, 8.6) | 32.4 (29.5, 35.3) | 1.3 (0.6, 2.1) |
| 30 - 34 | 5.6 (4.7, 6.6) | 30.0 (28.1, 31.9) | 1.7 (1.2, 2.2) |
| 35 - 53 | 5.4 (4.5, 6.3) | 28.0 (26.2, 29.8) | 0.9 (0.5, 1.3) |
| **Maternal Country of Birth** | | | |
| Not Ireland | 4.8 (3.6, 5.9) | 26.8 (24.4, 29.2) | 1.5 (0.7, 2.3) |
| Ireland | 6.6 (5.9, 7.2) | 31.7 (30.3, 33.0) | 1.2 (0.9, 1.5) |
| **Maternal University Education** | | | |
| Not university level | 6.6 (5.8, 7.3) | 31.7 (30.3, 33.2) | 1.3 (0.9, 1.6) |
| University level | 5.4 (4.5, 6.2) | 28.0 (26.2, 29.8) | 1.2 (0.8, 1.6) |
| **Antibiotics prescription in the past year** | | | |
| No | 1.6 (1.1, 2.1) | 13.0 (11.5, 14.5) | 0.4 (0.1, 0.7) |
| At least one course | 8.7 (7.8, 9.5) | 39.9 (38.4, 41.4) | 1.7 (1.3, 2.1) |

Additional File 1c. Weighted prevalences of asthma, wheezing and respiratory allergies at 9 years old, by selected maternal characteristics and birth details. Source: Authors’ calculations using data from the Growing Up in Ireland Cohort’08.

|  | **Asthma prevalence (95% CI)** | **Wheezing prevalence [95% CI)** | **Respiratory allergy prevalence (95% CI)** |
| --- | --- | --- | --- |
| **Baby gender** | | | |
| Female | 6.9 (5.9, 7.9] | 13.3 [12.0, 14.7) | 2.1 (1.6, 2.6) |
| Male | 11.0 (9.8, 12.2] | 17.7 [16.2, 19.1) | 3.2 (2.6, 3.9) |
| **Household Income Quintile** | | | |
| 1 (lowest) | 12.0 (9.6, 14.5%) | 19.5 (16.7, 22.4) | 2.1 (1.1, 3.1) |
| 2 | 9.8 (7.8, 11.7%) | 16.1 (13.7, 18.5) | 2.9 (1.9, 3.9) |
| 3 | 8.6 (6.7, 10.4%) | 14.7 (12.3, 17.0) | 2.3 (1.4, 3.3) |
| 4 | 7.6 (6.1, 9.1%) | 14.7 (12.6, 16.8) | 4.0 (2.8, 5.2) |
| 5 (highest) | 7.4 (5.9, 9.0%) | 13.0 (11.2, 14.9) | 2.8 (1.9, 3.7) |
| **Household Smoking** | | | |
| No | 8.6 (7.6, 9.5) | 14.5 (13.4, 15.6) | 2.8 (2.3, 3.4) |
| Yes | 9.7 (8.2, 11.2) | 17.4 (15.4, 19.3) | 2.3 (1.6, 3.1) |
| **Maternal Health** | | | |
| Absence of diseases | 8.3 (7.5, 9.1) | 14.6 (13.6, 15.6) | 2.6 (2.1, 3.0) |
| Any chronic disease | 14.0 (11.1, 16.9) | 22.3 (18.9, 25.7) | 3.4 (2.1, 4.7) |
| **Maternal Age Group** | | | |
| 13 - 19 | 17.4 (7.6, 27.2) | 27.9 (15.7, 40.1) | 3.0 (-0.8, 6.8) |
| 20 - 24 | 11.4 (8.1, 14.8) | 18.2 (14.3, 22.1) | 1.8 (0.7, 2.9) |
| 25 - 29 | 7.8 (6.2, 9.5) | 13.4 (11.3, 15.5) | 1.8 (0.9, 2.6) |
| 30 - 34 | 8.5 (7.3, 9.7) | 15.3 (13.7, 16.8) | 3.5 (2.7, 4.3) |
| 35 - 53 | 9.0 (7.7, 10.4) | 15.7 (14.1, 17.4) | 2.6 (1.9, 3.3) |
| **Maternal Country of Birth** | | | |
| Not Ireland | 8.3 (6.5, 10.1) | 16.0 (13.6, 18.3) | 2.8 (1.9, 3.7) |
| Ireland | 9.2 (8.3, 10.1) | 15.5 (14.4, 16.6) | 2.6 (2.2, 3.1) |
| **Maternal University Education** | | | |
| Not university level | 9.6 (8.6, 10.7) | 16.1 (14.8, 17.4) | 2.4 (1.9, 2.9) |
| University level | 7.3 (6.3, 8.4) | 14.0 (12.6, 15.4) | 3.3 (2.6, 4.0) |
| **Antibiotics prescription in the past year)** | | | |
| No | 5.7 (4.9, 6.5) | 8.2 (7.3, 9.1) | 1.8 (1.4, 2.2) |
| At least one course | 15.4 (13.7, 17.1) | 29.8 (27.6, 32.0) | 4.3 (3.4, 5.3) |
| **Child BMI** | | | |
| Non overweight | 7.9 (7.1, 8.8) | 14.0 (12.9, 15.0) | 2.8 (2.3, 3.3) |
| Overweight | 11.6 (9.3, 13.9) | 18.5 (15.9, 21.1) | 2.7 (1.7, 3.7) |
| Obesity | 12.7 (8.4, 17.1) | 23.9 (18.2, 29.6) | 1.5 (0.1, 2.8) |

Additional File 2a. Descriptive statistics showing unweighted counts and weighted percentages for asthma and respiratory symptoms at 9 months of age, by sociodemographic characteristics and birth details. Source: Authors’ calculations using data from the Growing Up in Ireland Cohort’08.

|  | **Total**  Count (%) | **Asthma**  Count (%) | **Respiratory symptoms**  Count (%) |
| --- | --- | --- | --- |
| **Perinatal outcomes** | | | |
| **Prematurity** | 726 (6.5) | 42 (10.3) | 90 (9.9) |
| No Prematurity | 10397 (93.5) | 373 (89.7) | 858 (90.1) |
| Missing | 11 | 4 | 1 |
| **Low birth weight** | 672 (6.2) | 43 (11.1) | 73 (8.9) |
| No Low birth weight | 10332 (93.8) | 371 (88.9) | 864 (91.1) |
| Missing | 130 | 5 | 12 |
| **NICU admission** | 1570 (14.4) | 97 (25.4) | 181 (20.3) |
| No NICU admission | 9558 (85.6) | 321 (74.6) | 767 (79.7) |
| Missing | 6 | 1 | 1 |
| **Poor housing conditions** | | | |
| **Inadequate household warmth** | 199 (1.7) | 17 (4.1) | 23 (2.1) |
| No | 10922 (98.3) | 402 (95.9) | 926 (97.9) |
| Missing | 13 | 0 | 0 |
| **Inability to use heating** | 811 (7.3) | 49 (10.9) | 103 (10.9) |
| No | 10320 (92.7) | 370 (89.1) | 846 (89.1) |
| Missing | 3 | 0 | 0 |
| **Warmth deprivation** | 919 (8.2) | 57 (13.4) | 114 (12.0) |
| No | 10215 (91.8) | 362 (86.6) | 835 (88.0) |
| Missing |  | 0 | 0 |
| **Maternal Health** | | | |
| Any chronic disease | 1270 (12.2) | 70 (17.4) | 187 (21.3) |
| Absence of diseases | 9861 (87.8) | 349 (82.6) | 762 (78.7) |
| Missing | 3 | 0 | 0 |
| **Gender of the baby** | | | |
| Male | 5679 (51.3) | 257 (62.3) | 592 (62.8) |
| Female | 5455 (48.7) | 162 (37.7) | 357 (37.2) |
| Missing |  | 0 | 0 |
| **Maternal University Education** | | | |
| University level or higher | 4031 (29.2) | 120 (23.4) | 279 (23.1) |
| Not university level | 7093 (70.8) | 299 (76.6) | 670 (76.9) |
| Missing | 10 | 0 | 0 |
| **Smoking in the household** | | | |
| At least one person | 4144 (37.3) | 193 (45.4) | 406 (43.0) |
| Nobody smoked | 6966 (62.7) | 226 (54.6) | 543 (57.0) |
| Missing | 24 | 0 | 0 |

Additional File 2b. Descriptive statistics showing unweighted counts and weighted percentages for asthma and wheezing at 3 years of age, by sociodemographic characteristics and birth details. Source: Authors’ calculations using data from the Growing Up in Ireland Cohort’08.

|  | **Total**  Count (%) | **Asthma**  Count (%) | **Wheezing**  Count (%) |
| --- | --- | --- | --- |
| **Perinatal outcomes** | | | |
| **Prematurity** | 613 (6.5) | 58 (9) | 237 (8.5) |
| No Prematurity | 9170 (93.5) | 521 (91) | 2615 (91.5) |
| Missing | 10 | 1 | 5 |
| **Low birth weight** | 579 (6.3) | 44 (8.8) | 207 (7.8) |
| No Low birth weight | 9098 (93.7) | 529 (91.2) | 2609 (92.2) |
| Missing | 116 | 7 | 41 |
| **NICU admission** | 1383 (14.6) | 123 (20.9) | 517 (18.5) |
| No NICU admission | 8404 (85.4) | 456 (79.1) | 2339 (81.5) |
| Missing | 6 | 1 | 1 |
| **Poor housing conditions** | | | |
| **I****nadequate household warmth** | 178 (1.6) | 13 (1.5) | 59 (1.9) |
| No | 9609 (98.4) | 567 (98.5) | 2797 (98.1) |
| Missing | 6 | 0 | 1 |
| **Inability to use heating** | 858 (8.6) | 65 (10.3) | 329 (11.8) |
| No | 8931 (91.4) | 515 (89.7) | 2527 (88.2) |
| Missing | 4 | 0 | 1 |
| **Dampness** | 192 (1.9) | 13 (2.2) | 63 (2.5) |
| **No** | 9601 (98.1) | 567 (97.8) | 2794 (97.5) |
| Missing | 0 | 0 | 0 |
| **Warmth deprivation** | 944 (9.4) | 68 (10.7) | 352 (12.4) |
| No | 8849 (90.6) | 512 (89.3) | 2505 (87.6) |
| Missing | 0 | 0 | 0 |
| **Maternal Health** | | | |
| Any chronic disease | 1123 (12.2) | 121 (23) | 434 (15.7) |
| Absence of diseases | 8668 (87.8) | 459 (77) | 2422 (84.3) |
| Missing | 2 | 0 | 1 |
| **Gender of the baby** | | | |
| Male | 4967 (51.3) | 372 (63.7) | 1567 (55.2) |
| Female | 4826 (48.7) | 208 (36.3) | 1290 (44.8) |
| Missing | 0 | 0 | 0 |
| **Maternal University Education** | | | |
| University level or higher | 3620 (29.2) | 184 (25.3) | 962 (26.6) |
| Not university level | 6167 (70.8) | 396 (74.7) | 1893 (73.4) |
| Missing | 6 | 0 | 2 |
| **Smoking in the household** | | | |
| At least one person | 3312 (34.7) | 214 (37.5) | 1042 (37.1) |
| Nobody smoked | 6467 (65.3) | 365 (62.5) | 1813 (62.9) |
| Missing | 14 | 1 | 2 |

Additional File 2c. Descriptive statistics showing unweighted counts and weighted percentages for asthma and wheezing at 9 years of age, by sociodemographic characteristics and birth details. Source: Authors’ calculations using data from the Growing Up in Ireland Cohort’08.

|  | **Total**  Count (%) | **Asthma**  Count (%) | **Wheezing**  Count (%) |
| --- | --- | --- | --- |
| **Perinatal outcomes** | | | |
| **Prematurity** | 491 (6.3) | 61 (8.7) | 98 (8.6) |
| No Prematurity | 7533 (93.7) | 594 (91.3) | 1112 (91.4) |
| Missing | 8 | 0 | 0 |
| **Low birth weight** | 465 (6.2) | 50 (7.3) | 85 (7.1) |
| No Low birth weight | 7477 (93.8) | 597 (92.7) | 1110 (92.9) |
| Missing | 90 | 8 | 15 |
| **NICU admission** | 1104 (14.1) | 131 (19.7) | 207 (16.9) |
| No NICU admission | 6923 (85.9) | 523 (80.3) | 1001 (83.1) |
| Misssings | 5 | 1 | 2 |
| **Poor housing conditions** | | | |
| **Inadequate household warmth** | 105 (1.4) | 11 (2.5) | 22 (2.3) |
| No | 7911 (98.6) | 644 (97.5) | 1186 (97.7) |
| Missing | 16 | 0 | 2 |
| **Inability to use heating** | 446 (6.6) | 46 (7.3) | 91 (8.1) |
| No | 7571 (93.4) | 609 (92.7) | 1117 (91.9) |
| Missing | 15 | 0 | 2 |
| **Dampness** | 825 (11.6) | 83 (13.8) | 149 (13.7) |
| No | 7207 (88.4) | 572 (86.2) | 1061 (86.3) |
| Missing | 0 | 0 | 0 |
| **Warmth deprivation** | 488 (7.3) | 48 (8.1) | 98 (8.8) |
| No | 7544 (92.7) | 607 (91.9) | 1112 (91.2) |
| Missing | 0 | 0 | 0 |
| **Maternal Health** | | | |
| Any chronic disease | 933 (12.6) | 121 (19.7) | 197 (18.2) |
| Absence of diseases | 7098 (87.4) | 534 (80.3) | 1013 (81.8) |
| Missing | 1 | 0 | 0 |
| **Gender of the baby** | | | |
| Male | 4041 (51.3) | 405 (62.7) | 709 (58.2) |
| Female | 3991 (48.7) | 250 (37.3) | 501 (41.8) |
| Missing | 0 | 0 | 0 |
| **Maternal University Education** | | | |
| University level or higher | 3110 (27.2) | 219 (22.2) | 430 (24.5) |
| Not university level | 4918 (72.8) | 436 (77.8) | 779 (75.5) |
| Missing | 4 | 0 | 1 |
| **Smoking in the household** | | | |
| At least one person | 2406 (34.4) | 222 (37.3) | 413 (38.6) |
| Nobody smoked | 5574 (65.6) | 428 (62.7) | 787 (61.4) |
| Missing | 52 | 5 | 10 |
| **Child BMI** | | | |
| Overweight | 1658 (22.9) | 178 (30.8) | 316 (29.6) |
| Normal weight | 6165 (77.1) | 456 (69.2) | 853 (70.4) |
| Missing | 209 | 21 | 41 |

|  | **9 months** | | **3 years** | | **9 years** | |
| --- | --- | --- | --- | --- | --- | --- |
| **Asthma** | **Symptoms only** | **Asthma** | **Wheezing** | **Asthma** | **Wheezing** |
| **Prematurity** | 1.59 (1.08, 2.34) * | 1.56 (1.17, 2.08) ** | 1.38 (0.99, 1.91) + | 1.52 (1.24, 1.86) *** | 1.50 (1.05, 2.14) * | 1.53 (1.15, 2.05) ** |
| Maternal Health (Chronic disease) | 1.47 (1.12, 1.94) ** | 2.02 (1.64, 2.47) *** | 2.03 (1.46, 2.82) *** | 1.56 (1.32, 1.83) *** | 1.60 (1.23, 2.07) *** | 1.47 (1.20, 1.80) *** |
| Smoking in the household | 0.99 (0.97, 1.00) | 0.96 (0.94, 0.99) * | 1.01 (0.99, 1.03) | 0.99 (0.98, 1.01) | 1.00 (0.99, 1.02) | 1.01 (1.00, 1.02) |
| Male | 1.61 (1.27, 2.04) *** | 1.71 (1.45, 2.01) *** | 1.75 (1.42, 2.16) *** | 1.25 (1.12, 1.39) *** | 1.67 (1.36, 2.05) *** | 1.40 (1.20, 1.64) *** |
| Education (University level) | 0.75 (0.59, 0.96) * | 0.72 (0.61, 0.85) *** | 0.83 (0.67, 1.02) + | 0.84 (0.76, 0.94) ** | 0.79 (0.65, 0.97) * | 0.90 (0.77, 1.05) |
| Child Overweight | - | - | - | - | 1.54 (1.23, 1.93) *** | 1.49 (1.25, 1.78) *** |
| Constant | 0.03 (0.02, 0.04) *** | 0.07 (0.06, 0.08) *** | 0.04 (0.04, 0.05) *** | 0.37 (0.34, 0.40) *** | 0.06 (0.05, 0.07) *** | 0.12 (0.11, 0.14) *** |
| Observations | 11,113 | 11,113 | 9,777 | 9,771 | 7,812 |  |
|  | **Asthma** | **Symptoms only** | **Asthma** | **Wheezing** | **Asthma** | **Wheezing** |
| **LBW** | 1.89 (1.28, 2.80) ** | 1.46 (1.06, 2.00) * | 1.44 (0.98, 2.11) + | 1.41 (1.14, 1.75) ** | 1.28 (0.88, 1.87) | 1.26 (0.94, 1.70) |
| Maternal Health (Chronic disease) | 1.41 (1.07, 1.85) * | 2.01 (1.63, 2.47) *** | 2.07 1.48, 2.89) *** | 1.59 (1.35, 1.87) *** | 1.60 (1.23, 2.09) *** | 1.48 (1.20, 1.81) *** |
| Smoking in the household | 0.99 (0.97, 1.00) | 0.97 (0.94, 0.99) * | 1.01 (0.99, 1.02) | 0.99 (0.98, 1.01) | 1.00 (0.99, 1.02) | 1.01 (1.00, 1.02) |
| Male | 1.66 (1.31, 2.10) *** | 1.73 (1.47, 2.04) *** | 1.74 (1.41, 2.15) *** | 1.25 (1.13, 1.39) *** | 1.69 (1.37, 2.07) *** | 1.40 (1.20, 1.64) *** |
| Education (University level) | 0.74 (0.58, 0.94) * | 0.71 (0.60, 0.84) *** | 0.85 (0.69, 1.05) | 0.85 (0.76, 0.94) ** | 0.80 (0.65, 0.98) * | 0.90 (0.77, 1.05) |
| Child Overweight | - | - | - | - | 1.54 (1.22, 1.93) *** | 1.49 (1.24, 1.78) *** |
| Constant | 0.03 (0.03, 0.04) *** | 0.07 (0.06, 0.08) *** | 0.04 (0.03, 0.05) *** | 0.37 (0.33, 0.40) *** | 0.06 (0.05, 0.07) *** | 0.12 (0.11, 0.14) *** |
| Observations | 10,994 | 10,994 | 9,671 | 9,665 | 7,733 | 7,733 |
|  | **9 months** | | **3 years** | | **9 years** | |
| Asthma | Symptoms only | Asthma | Wheezing | Asthma | Wheezing |
| **NICU** | 1.73 (1.36, 2.20) *** | 1.43 (1.21, 1.69) | 1.43 (1.21, 1.70) *** | 1.41 (1.22, 1.64) *** | 1.54 (1.23, 1.92) *** | 1.29 (1.09, 1.53) ** |
| Maternal Health (Chronic disease) | 1.44 (1.10, 1.90) ** | 2.00 (1.63, 2.46) | 2.02 (1.46, 2.79) *** | 1.55 (1.32, 1.83) *** | 1.59 (1.23, 2.06) *** | 1.47 (1.20, 1.80) *** |
| Smoking in the household | 0.99 (0.97, 1.00) | 0.97 (0.94, 0.99) | 1.01 (0.99, 1.03) | 0.99 (0.98, 1.01) | 1.00 (0.99, 1.02) | 1.01 (1.00, 1.02) |
| Male | 1.63 (1.29, 2.06) *** | 1.72 (1.46, 2.02) | 1.76 (1.43, 2.18) *** | 1.25 (1.13, 1.39) *** | 1.68 (1.37, 2.06) *** | 1.41 (1.20, 1.65) *** |
| Education (University level) | 0.73 (0.57, 0.93) * | 0.71 (0.60, 0.84) * | 0.82 (0.67, 1.02) + | 0.84 (0.75, 0.93) ** | 0.79 (0.64, 0.96) * | 0.90 (0.77, 1.04) |
|  |  |  |  |  |  |  |
| Child Overweight | - | - | - | - | 1.55 (1.24, 1.95) *** | 1.50 (1.25, 1.79) *** |
| Constant | 0.03 (0.02, 0.04) *** | 0.07 (0.06, 0.08) | 0.04 (0.03, 0.05) *** | 0.36 (0.33, 0.39) *** | 0.06 (0.05, 0.07) *** | 0.12 (0.10, 0.14) *** |
| Observations | 11,122 | 11,122 | 9,785 | 9,779 | 7, 818 | 7, 818 |

Additional File 3. Association between adverse perinatal outcomes and respiratory diseases at ages 9 months, 3 and 9. Logistic regression models; adjusted odds ratios (AOR) are reported. Source: Authors’ estimations, data from Growing Up in Ireland Cohort’08. Two-tailed t-tests: + p <0.10, * p <0.05, ** p <0.01, *** p <0.001

Additional File 4. Association between inadequate housing conditions and respiratory diseases at ages 9 months, 3 and 9. Logistic regression models; adjusted odds ratios (AOR) are reported. Authors’ estimations, data from Growing Up in Ireland Cohort’08. Two-tailed t-tests: + p < 0.10, * p < 0.05, ** p < 0.01, *** p < 0.001

|  | **9 months** | | **3 years** | | **9 years** | |
| --- | --- | --- | --- | --- | --- | --- |
| **Asthma** | **Symptoms only** | **Asthma** | **Wheezing** | **Asthma** | **Wheezing** |
| **Inadequate household warmth** | 1.21 (1.01, 1.44) * | 0.98 (0.77, 1.25) | 1.00 (0.78, 1.28) | 1.13 (0.95, 1.34) | 0.71 (0.35, 1.43) | 1.02 (0.72, 1.44) |
| Maternal Health (Chronic disease) | 1.48 (1.13, 1.95) ** | 2.04 (1.66, 2.50) *** | 2.06 (1.48, 2.87) *** | 1.58 (1.34, 1.86) *** | 1.59 (1.22, 2.08) *** | 1.45 (1.18, 1.77) *** |
| Smoking in the household | 0.98 (0.97, 1.00) + | 0.96 (0.94, 0.99) * | 1.01 (0.99, 1.03) | 0.99 (0.98, 1.01) | 1.00 (0.99, 1.02) | 1.01 (1.00, 1.02) |
| Male | 1.62 (1.28, 2.05) *** | 1.72 (1.46, 2.02) *** | 1.76 (1.43, 2.17) *** | 1.26 (1.13, 1.40) *** | 1.61 (1.31, 1.99) *** | 1.38 (1.17, 1.61) *** |
| Education (University level) | 0.73 (0.57, 0.94) * | 0.71 (0.60, 0.84) *** | 0.83 (0.67, 1.02) + | 0.84 (0.76, 0.94) ** | 0.80 (0.65, 0.98) * | 0.91 (0.78, 1.06) |
| Child Overweight |  |  |  |  | 1.52 (1.21, 1.91) *** | 1.45 (1.21, 1.74) *** |
| Constant | 0.03 (0.03, 0.04) *** | 0.07 (0.06, 0.08) *** | 0.04 (0.04, 0.05) *** | 0.37 (0.34, 0.41) *** | 0.06 (0.05, 0.08) *** | 0.13 (0.11, 0.15) *** |
| Observations | 11124 | 11124 | 9787 | 9781 | 7571 | 7571 |
|  | **9 months** | | **3 years** | | **9 years** | |
| Asthma | Symptoms only | Asthma | Wheezing | Asthma | Wheezing |
| **Inability to use heating** | 1.43 (1.01, 2.03) * | 1.46 (1.13, 1.89) ** | 1.18 (0.82, 1.68) | 1.36 (1.11, 1.66) ** | 0.85 (0.58, 1.26) | 1.18 (0.92, 1.52) |
| Maternal Health (Chronic disease) | 1.46 (1.11, 1.93) ** | 2.01 (1.64, 2.47) *** | 2.06 (1.48, 2.86) *** | 1.58 (1.34, 1.86) *** | 1.60 (1.22, 2.09) *** | 1.44 (1.18, 1.76) *** |
| Smoking in the household | 0.99 (0.97, 1.00) | 0.96 (0.94, 0.99) * | 1.01 (0.99, 1.03) | 0.99 (0.98, 1.01) | 1.00 (0.99, 1.02) | 1.01 (1.00, 1.02) |
| Male | 1.62 (1.28, 2.04) *** | 1.72 (1.46, 2.02) *** | 1.76 (1.43, 2.17) *** | 1.26 (1.13, 1.40) *** | 1.62 (1.31, 1.99) *** | 1.38 (1.17, 1.61) *** |
| Education (University level) | 0.75 (0.59, 0.96) * | 0.73 (0.62, 0.86) *** | 0.84 (0.68, 1.03) + | 0.86 (0.77, 0.95) ** | 0.79 (0.64, 0.97) * | 0.92 (0.79, 1.08) |
| Child Overweight |  |  |  |  | 1.53 (1.21, 1.93) *** | 1.44 (1.20, 1.73) *** |
| Constant | 0.03 (0.03, 0.04) *** | 0.07 (0.06, 0.08) *** | 0.04 (0.04, 0.05) *** | 0.37 (0.33, 0.40) *** | 0.06 (0.05, 0.08) *** | 0.13 (0.11, 0.15) *** |
| Observations | 11124 | 11124 | 9787 | 9781 | 7571 | 7571 |
|  | **9 months** | | **3 years** | | **9 years** | |
| Asthma | Symptoms only | Asthma | Wheezing | Asthma | Wheezing |
| **Warmth deprivation** | 1.67 (1.16, 2.39) ** | 1.46 (1.13, 1.88) ** | 1.18 (0.83, 1.69) | 1.35 (1.11, 1.64) ** | 0.89 (0.61, 1.29) | 1.25 (0.95, 1.63) |
| Maternal Health (Chronic disease) | 1.45 (1.10, 1.90) ** | 2.01 (1.64, 2.46) *** | 2.05 (1.48, 2.85) *** | 1.57 (1.34, 1.85) *** | 1.60 (1.22, 2.09) *** | 1.43 (1.17, 1.75) *** |
| Smoking in the household | 0.99 (0.97, 1.00) | 0.96 (0.94, 0.99) * | 1.01 (0.99, 1.03) | 0.99 (0.98, 1.01) | 1.00 (0.99, 1.02) | 1.01 (1.00, 1.02) |
| Male | 1.62 (1.28, 2.04) *** | 1.72 (1.46, 2.02) *** | 1.76 (1.43, 2.17) *** | 1.26 (1.13, 1.40) *** | 1.62 (1.31, 1.99) *** | 1.38 (1.17, 1.61) *** |
| Education (University level) | 0.76 (0.59, 0.97) * | 0.73 (0.62, 0.86) *** | 0.84 (0.68, 1.03) + | 0.86 (0.77, 0.95) ** | 0.79 (0.64, 0.97) * | 0.92 (0.79, 1.08) |
| Child Overweight |  |  |  |  | 1.53 (1.21, 1.92) *** | 1.44 (1.20, 1.73) *** |
| Constant | 0.03 (0.03, 0.04) *** | 0.07 (0.06, 0.08) *** | 0.04 (0.04, 0.05) *** | 0.37 (0.33, 0.40) *** | 0.06 (0.05, 0.08) *** | 0.13 (0.11, 0.15) *** |
| Observations | 11124 | 11124 | 9787 | 9781 | 7571 | 7571 |
|  | **9 months** | | **3 years** | | **9 years** | |
| Asthma | Symptoms only | Asthma | Wheezing | Asthma | Wheezing |
| **Dampness** |  |  | 1.07 (0.49, 2.33) | 1.49 (1.00, 2.21) * | 1.36 (0.55, 1.70) | 1.13 (0.60, 2.14) |
| Maternal Health (Chronic disease) | - | - | 2.06 (1.48, 2.87) *** | 1.57 (1.34, 1.85) *** | 1.60 (1.23, 2.07) *** | 1.47 (1.20, 1.80) *** |
| Smoking in the household | - | - | 1.01 (0.99, 1.03) | 0.99 (0.98, 1.01) | 1.00 (0.99, 1.02) | 1.01 (1.00, 1.02) |
| Male | - | - | 1.76 (1.43, 2.17) *** | 1.26 (1.13, 1.39) *** | 1.67 (1.36, 2.06) *** | 1.41 (1.20, 1.65) *** |
| Education (University level) | - | - | 0.83 (0.67, 1.02) | 0.84 (0.76, 0.94) ** | 0.79 (0.65, 0.97) * | 0.90 (0.77, 1.05) |
| Child Overweight | - | - | - | - | 1.54 (1.23, 1.93) *** | 1.49 (1.25, 1.78) *** |
| Constant | - | - | 0.04 (0.04, 0.05) *** | 0.37 (0.34, 0.41) *** | 0.06 (0.05, 0.07) *** | 0.13 (0.11, 0.15) *** |
| Observations | - | - | 9787 | 9781 | 7820 | 7820 |

|  | **Asthma** | | | | |
| --- | --- | --- | --- | --- | --- |
| **Prematurity x Inadequate household warmth** | 5.96 (1.32, 26.96) * | **Prematurity x Inability to use heating** | 0.25 (0.06, 1.09) + | **Prematurity x Warmth Deprivation** | 1.43 (0.46, 4.43) |
| Prematurity | 1.37 (0.93, 2.03) | Prematurity | 1.81 (1.21, 2.70) ** | Prematurity | 1.48 (0.99, 2.21) + |
| Inadequate household warmth | 1.36 (0.64, 2.93) | Inability to use heating | 1.59 (1.07, 2.38) * | Warmth deprivation | 1.48 (1.00, 2.19) + |
| Maternal Health (Chronic disease) | 1.40 (1.08, 1.82) * | Maternal Health (Chronic disease) | 1.44 (1.09, 1.89) ** | Maternal Health (Chronic disease) | 1.43 (1.09, 2.87) ** |
| Smoking in the household | 0.99 (0.97, 1.00) | Smoking in the household | 0.99 (0.97, 1.00) | Smoking in the household | 0.99 (0.97, 1.00) |
| Male | 1.62 (1.28, 2.04) *** | Male | 1.61 (1.27, 2.03) *** | Male | 1.61 (1.27, 2.03) *** |
| Education (University level) | 0.74 (0.58, 0.94) * | Education (University level) | 0.75 (0.58, 0.96) * | Education (University level) | 0.75 (0.59, 0.96) * |
| Constant | 0.03 (0.03, 0.04) *** | Constant | 0.03 (0.02, 0.04) *** | Constant | 0.03 (0.02, 0.04) *** |
| Observations | 11103 | Observations | 11112 | Observations | 11113 |
|  | **Asthma** | | | | |
| **LBW x Inadequate household warmth** | 8.91 (1.19, 41.63) ** | **LBW x Inability to use heating** | 0.04 (0.00, 0.30) ** | **LBW x Warmth Deprivation** | 1.19 (0.33, 4.23) |
| LBW | 1.33 (0.80, 2.23) | LBW | 1.85 (1.15, 2.97) * | LBW | 1.51 (0.90, 2.53) |
| Prematurity | 1.23 (0.79, 1.93) | Prematurity | 1.23 (0.79, 1.91) | Prematurity | 1.25 (0.80, 1.93) |
| Inadequate household warmth | 1.18 (0.52, 2.68) | Inability to use heating | 1.64 (1.10, 2.44) * | Warmth deprivation | 1.49 (1.00, 2.20) * |
| Maternal Health (Chronic disease) | 1.36 (1.04, 1.77) * | Maternal Health (Chronic disease) | 1.39 (1.06, 1.83) * | Maternal Health (Chronic disease) | 1.38 (1.06, 1.81) * |
| Smoking in the household | 0.99 (0.98, 1.00) | Smoking in the household | 0.99 (0.97, 1.00) | Smoking in the household | 0.99 (0.97, 1.00) |
| Male | 1.65 (1.31, 2.10) *** | Male | 1.63 (1.29, 2.07) *** | Male | 1.65 (1.30, 2.09) *** |
| Education (University level) | 0.74 (0.58, 0.95) * | Education (University level) | 0.75 (0.58, 0.96) * | Education (University level) | 0.75 (0.59, 0.97) * |
| Constant | 0.03 (0.03, 0.04) *** | Constant | 0.03 (0.02, 0.04) *** | Constant | 0.03 (0.02, 0.04) *** |
| Observations | 10973 | Observations | 10982 | Observations | 10983 |
|  | **Asthma** | | | | |
| **NICU x Inadequate household warmth** | 3.10 (0.83, 11.56) | **NICU x Inability to use heating** | 0.44 (0.16, 1.26) | **NICU x Warmth Deprivation** | 1.07 (0.45, 2.52) |
| NICU admission | 1.66 (1.33, 2.07) *** | Nicu admission | 1.82 (1.37, 2.42) *** | NICU admission | 1.71 (1.34, 2.18) *** |
| Inadequate household warmth | 1.57 (0.72, 3.43) | Inability to use heating | 1.70 (1.12, 2.58) * | Warmth deprivation | 1.61 (1.07, 2.42) * |
| Maternal Health (Chronic disease) | 1.41 (1.08, 1.83) * | Maternal Health (Chronic disease) | 1.42 (1.08, 1.87) * | Maternal Health (Chronic disease) | 1.42 (1.08, 1.85) * |
| Smoking in the household | 0.99 (0.97, 1.00) + | Smoking in the household | 0.99 (0.97, 1.00) | Smoking in the household | 0.99 (0.97, 1.00) |
| Male | 1.64 (1.29, 2.07) *** | Male | 1.62 (1.28, 2.06) *** | Male | 1.63 (1.29, 2.06) *** |
| Education (University level) | 0.73 (0.57, 0.94) * | Education (University level) | 0.74 (0.58, 0.95) * | Education (University level) | 0.75 (0.59, 0.97) * |
| Constant | 0.03 (0.02, 0.04) *** | Constant | 0.03 (0.02, 0.04) *** | Constant | 0.03 (0.02, 0.03) *** |
| Observations | 11112 | Observations | 11121 | Observations | 11122 |

Additional File 5. Interaction between adverse perinatal outcomes and inadequate housing conditions on the probability of asthma at 9 months. Logistic regression models: adjusted odds ratios (AOR) are reported. Authors’ estimations, data from Growing Up in Ireland Cohort’08. Two-tailed t-tests: + p < 0.10, * p < 0.05, ** p < 0.01, *** p < 0.001
